# Supplementary material
Source: Elsevier journal article supplement (http://isuku.info/IT/MMC1.pdf)
Supplement: MMC1 [file MMC1.pdf]

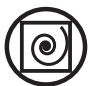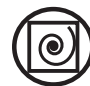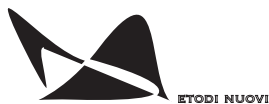

DANIELE VENTURI

---

NEUE PRAKTISCHE METHODE  
FUNKTIONALE ÜBUNGEN FÜR CHOR  
208 ÜBUNGEN FÜR GEMISCHTEN CHOR

NEW PRACTICAL METHOD  
OF FUNCTIONAL EXERCISES FOR CHOIR  
*208 EXERCISES FOR MIXED CHOIR*

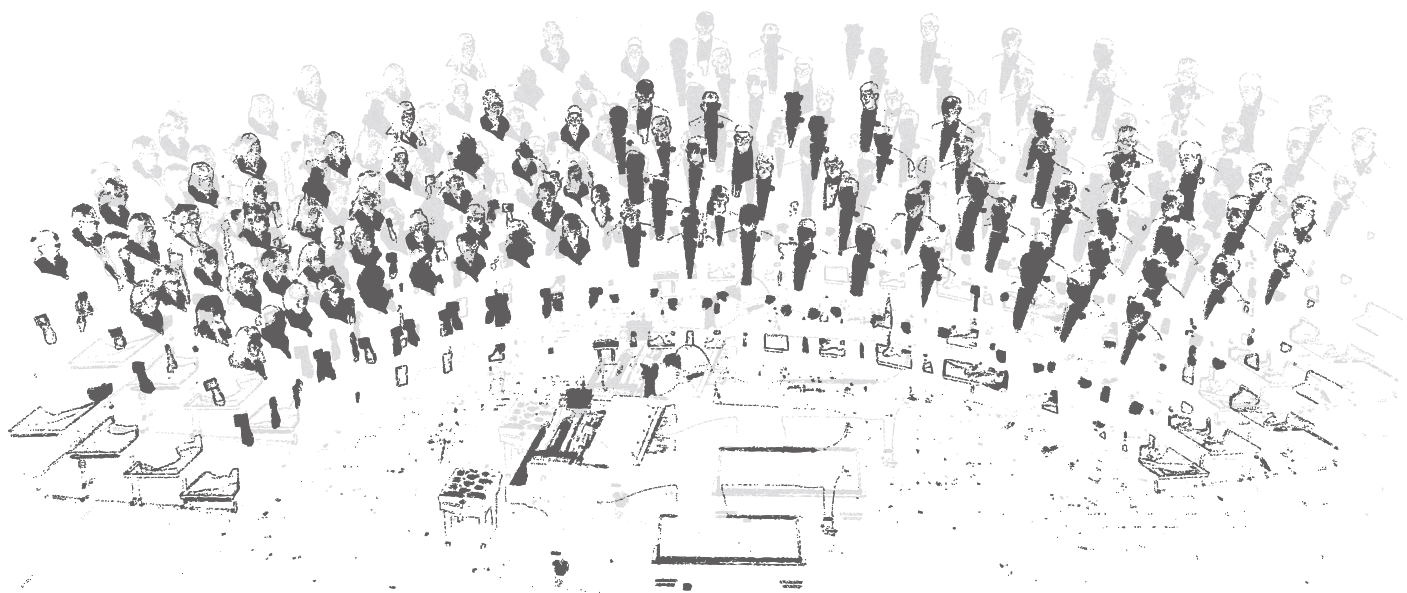

VOL. 1  
BAND 1

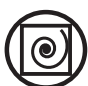

ISUKU VERLAG

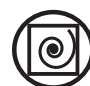

Erste Auflage – München 2015

© copyright 2015 Isuku Verlag  
Munich, Germany  
[www.isuku.de](http://www.isuku.de)  
[info@isuku.de](mailto:info@isuku.de)

Art. Nr. MMC1-DE15  
ISBN: 978-3-944605-09-8

Umschlaggestaltung: Chrisa Vasilopoulou

Revision of the english translation: Fabiana Ciampi, Susan Muratori  
*Revisione della traduzione in lingua inglese: Fabiana Ciampi, Susan Muratori*

Printed in Italy – corGae s.a.s. – via Cicogna, 131 San Lazzaro di Savena (Bo)

Alle Rechte vorbehalten.

Jegliche Vervielfältigung von Texten, auch die elektronische Speicherung und Weitergabe, ist untersagt.

## Einführung

Die in diesem Werk vorgeschlagene Methode ist die Synthese einer Arbeit mit mehreren Chören, die 1987 begonnen wurde. Der Chor "Gaudium" soll hier als Beispiel dienen, da ihm die meisten Übungen gewidmet sind. Die Methode, die in diesem Heft aufgezeigt wird, ermöglicht es einem Chor- bzw. Vokalensemble über einem Zeitraum von 10 Jahren aufzutreten.

Die in diesem Heft aufgezeigten Übungen verfolgen unter anderem das Ziel, die noch bestehenden Mängel der einzelnen Chormitglieder und damit des gesamten Chors zu schließen. Vielen Sängern, mit denen ich zusammengearbeitet habe, fiel das Notenlesen oder das Erlernen eines Musikstücks schwer. Oft fehlte das Rhythmusgefühl oder das nötige musikalische Gehör. Eine weitere Schwierigkeit stellte die Intonation der diatonischen Intervalle dar, oft schon innerhalb der gleichen Oktave.

Nicht nur Laienchöre – mitunter auch, professionelle Chöre – weisen Mängel auf, die von zahlreichen Chorleitern unterschätzt und dann heruntergespielt oder im schlimmsten Fall ignoriert werden. Trotz zahlreicher, zum Teil leider auch katastrophaler Reformen im Bildungswesen wird in Italien der Musik immer noch keine bedeutende Rolle zugesprochen.

Seitens der Politiker wird die musikalische Bildung heutzutage als Hauptfach nicht anerkannt, eher als etwas Unproduktives oder manchmal sogar Unnötiges. Die Folge ist, dass sie als Spaßfaktor mit Unterhaltungswert angesehen wird. Eine weitere Widrigkeit, bildet die Überforderung der Lehrkräfte, durch den ständigen Wechsel des Lehrprogrammes und dem oft auftretenden Analphabetismus bei den Schülern. Hinzu kommt, dass die Kürzungen im Bildungsetat die Lehrkräfte handlungsunfähig machen, wobei die Blockflöte dem Musikfach als einziges Instrument zugesprochen wird.

Aus den eben genannten Gründen und der damit einhergehenden schleichenden und unerbittlichen Erosion der Kultur, wurde das Singen im Schulchor als Bestandteil des Grundschulprogramms eliminiert. Wir wollen jedoch nicht unerwähnt lassen, dass es, Gottlob, einige wenige Ausnahmen gibt.

Dieser allgemeine Zustand lässt mich tief in meinem Herzen fühlen, dass ein großer Nachholbedarf an didaktischer Literatur für Chöre in Italien und darüber hinaus besteht.

Die "*Neue praktische Methode – Funktionale Übungen für Chor*" folgt der Idee, mittels bestimmter Übungen die einzelnen musikalischen Parameter zu verbessern, wie u. a. den Gesangstil, die Phrasierung und die Intonation.

Die Übungen sind nicht, wie üblich, aufsteigend nach Schwierigkeitsgrad sortiert, sondern abwechselnd nach ihrer Funktion. Die in diesem Heft aufgeführte Methode versteht sich als ein Pfad, auf dem ein Chorleiter navigieren kann. Es lässt sich aber auch als eine Art Nachschlagewerk einsetzen, aus dem Material geschöpft werden kann, um die musikalischen Fertigkeiten des Chores zu verbessern.

Meiner Erfahrung nach werden Methoden die nach aufsteigende Schwierigkeitsgraden strukturiert sind, nie vollständig durchgearbeitet.

Von den angebotenen Themen werden oft nur die einfacheren Übungen bearbeitet, während die schwierigeren bewusst ausgelassen werden. Dies hat zwingend zur Folge, dass der Studierende aus den Anfangsstadium nicht hinauswächst.

Jede Übung hat zum Ziel die zahlreichen Schwierigkeiten und möglichen Fehler

eines Chores aufzudecken und zu korrigieren.

Das Handbuch gliedert sich in vier Abschnitte:

Der erste Teil enthält „Vokalisierungen und vorbereitende Übungen“. Es handelt sich hierbei, um eine Reihe von Übungen, die von einer Gruppe, in kürzester Zeit erlernt werden können, wenn sie mit Geduld, Beharrlichkeit und Methodik durchgeführt werden.

Im zweiten Abschnitt werden die verschiedenen Rhythmen im Notenlesen geübt.

Diese Stücke sind nach dem üblichen Harmonieschema, in den Dur Tonleitern, geschrieben: I-IV-I(2r)-V-I. Wie alle Übungen in diesem Buch, können sie aber auch in die jeweilige Moll-Tonart gewechselt werden.

Die Stimmen können beliebig ausgetauscht werden, um andere Choral-Klänge zu erhalten und um neue Wege zu gehen, um beispielsweise bestimmte Probleme der Stimmen zu beheben, oder die gesamte Intonation des Chores zu verbessern.

Sobald der Chorsänger das Grundschema der Harmonie erlernt hat, kann er sich der Rhythmik widmen und sich der verschiedene Tempi annehmen, die je nach Übung unterschiedlich ausfallen. Auf dieser Weise verbessert er seine Lesefertigkeit auf ganz natürliche Weise.

Der dritte Abschnitt befasst sich mit den Übungen für den mehrstimmigen Gesang.

Anschließend geht es zum kompakten Hauptteil der vorgestellten Methode: Er besteht aus praktischen Übungen für den Chorgesang, die das Ziel verfolgen, über bestimmte Techniken, das Niveau des Chors technisch und musikalisch zu heben. Diese Techniken, vereinen den Intonation- wie den psychoakustischen Aspekt, ohne den praktischen Ansatz aus der Gehörbildung und des musikalischen Erinnerungsvermögens zu vernachlässigen.

Jede Übung sollte mit allen Phonemen geübt werden.

Aus diesem Grund ist es notwendig, dass der Chorleiter, die Artikulation der Konsonanten und Vokale den Problemen des Chores gezielt anpasst.

Die Konsonanten und Vokale in den Übungen, sowie die Dynamik, sind als Vorschläge gedachte und können nach Belieben verändert werden.

Ein Chor ist ein wunderbares und gleichzeitig auch geheimnisvolles Instrument.

Hier können die erhabensten Gefühle der menschlichen Seele ihren Ausdruck finden. In seinem Umfeld können Freundschaften geschlossen und persönliche Charaktere veredelt werden und noch vieles mehr.

Der Chor ist der Ursprung, eine Lebensschule, das heißt die höchste und zudem die wirtschaftlichste Weise, um große Musik zu praktizieren.

Ich hoffe, dass die von mir vorgeschlagenen Übungen dazu beitragen, die Qualität eines Chors zu verbessern.

*Daniele Venturi*

## Introduction

This method synthesizes a work I began in 1987 which involved several vocal ensembles.

Above all, I would like to mention "Gaudium choir" to whom are dedicated most of these exercises.

This method has been thought as a sort of "ideal journey" that can be done by a choir or vocal ensemble for a period of a decade at least.

These exercises have been written with the aim to fill in, until a certain extent, choir-singers technical and musical deficiencies, as my choir has.

Many of the singers with whom I have worked, seem to have problems in reading or learning music, in particular in memorizing texts.

They were often lacking a sense of rhythm, besides having a musical ear to improve as a result of many intonation problems (ex. diatonic intervals within the same pure octave).

Sometimes our amateur choirs, but also professional ones, are lacking in some important parts considered essential for a musician background however underestimated or even ignored by many choirmasters.

Despite the amount of disapproving music education reforms, Italy still doesn't play a significant role in putting basis for a "new" music education.

Unfortunately, music education has not been considered by today politicians as a relevant subject: rather as something unnecessary or not really useful, like a "funny entertainment".

Music teachers are so discouraged by continuous programs changing, illiteracy and a constant lack of financial sources, that are unable to teach (they even allow to play little recorders, which instead of producing "dolce" sounds, make very bitter ones, that I call "amari" sounds).

For arguments written above, due to a gradual but increasing "lack of culture", a part from few exceptions, choir singing as a matter of fact, has never taken part into Primary school programs.

This was the main reason which led me into this didactic purpose, written not only for Italians, but to everybody.

I have decided to entitle this book: "New practical method: functional exercises for choir" because each exercise has been thought to improve a specific musical matter as vocal training, musical phrasing and intonation. Exercises are not in a progressive order, as usual, but alternately according to their musical and didactic function.

The method shows a sort of "general plan" which can be followed by a choirmaster; however, it can be used also, as a kind of "Reference book", that I wish can be useful to improve choir musical skills.

In my opinion, methods that are structured according to ascending levels of difficulties, are never going to be done until the end. Usually, the simpler exercises are carefully chosen from the index by students to avoid the most difficult ones, which are obviously omitted. This necessarily means that a student will not improve as much as he could do from his initial stage of knowledge.

## PREMESSA

*Questo metodo sintetizza il lavoro che ho svolto dal 1987 ad oggi con diversi cori, tra i quali desidero citare il coro "Gaudium" a cui sono dedicati la maggior parte di questi esercizi. Il metodo è pensato come un ipotetico "viaggio", che un coro, o un ensemble vocale, potrà percorrere nel corso di almeno un decennio.*

*Questi esercizi sono stati scritti pensando di poter, seppur in parte, colmare le lacune dei miei coristi e di conseguenza del mio coro.*

*Molti dei cantori con cui ho lavorato, hanno dimostrato problemi di lettura, di apprendimento delle musiche e di memorizzazione dei testi, oltre che, spesso, uno scarso senso ritmico, un orecchio musicale da migliorare e di conseguenza delle problematiche d'intonazione degli intervalli diatonici, già all'interno dell'ottava giusta.*

*I nostri cori amatoriali e non solo, hanno tutt'oggi una serie di difetti che i direttori dei cori stessi, tendono frequentemente a minimizzare, a sottovalutare o ancor peggio ad ignorare. Nonostante le numerose e spesso disastrose riforme scolastiche, la musica non ha in Italia un ruolo centrale nella formazione dell'individuo.*

*L'educazione musicale non è considerata, dai politici di oggi, come una materia primaria, ma bensì improduttiva e superflua e perciò relegata al pari di un "ludico intrattenimento". Gli educatori musicali così disorientati dai continui cambi di programma, dall'analfabetismo dilagante, dai tagli selvaggi, ecc. si sono rifugiati in una sorta d'immobilismo didattico, che ha persino visto il rifiorire di didattiche musicali incentrate sui "flautini dolci", che oserei definire "amari".*

*Perciò, a causa di questo lento ed inesorabile degrado culturale, salvo le rare ed illuminate eccezioni, che, grazie a Dio, esistono, la pratica del canto corale non è mai entrata, di fatto, nelle scuole primarie.*

*Per tutto ciò sento, in cuor mio, che ci sia ancora un gran bisogno di opere didattiche per coro in Italia e non solo.*

*Ho deciso di intitolare questo libro "Nuovo metodo pratico di esercizi funzionali per coro" perché ogni singolo esercizio è pensato in funzione di un dato parametro musicale da migliorare: vocalità, fraseggio, intonazione, ecc..*

*Gli esercizi non sono presentati, come nella maggior parte dei metodi simili al mio, in maniera progressiva, ma in modo più vario e funzionale.*

*Il metodo vuole rappresentare una sorta di "tracciato" tra il quale il direttore di coro possa orientarsi, oltre che un "serbatoio" da cui poter attingere un materiale musicale che, spero, possa contribuire alla sua formazione e al miglioramento del coro stesso.*

*A mio avviso, i metodi che hanno una struttura a gradi di difficoltà, non vengono mai conclusi per intero.*

*Degli argomenti trattati, non di rado, il discente svolge maggiormente gli esercizi più semplici tra-*

Each exercise has been thought to solve one by one choir problems and those of a single voice.

This manual is divided into four sections:

the first part contains vocalizes and preparatory exercises or a series of exercises that can be learned by a group in a very short time if they are practiced with patience, constant effort and methodology.

In the second section you can find "Exercises to sung reading on different tempos".

These pieces are written following the main harmonic-scheme: I-IV-I (2r) V-I of major scale and can be performed also in minor keys as all the other exercises of this method.

Voices can be freely moved around to obtain various choral sounds and also many other ways to solve vocal intonation problems of a choir.

When a choir-singer will have learned the basic harmonic-scheme he can concentrate on rhythm and different tempos that are going to change for each exercise.

In this way, choir singer will improve his reading skills in a natural way.

Third section is on "Polyphonic singing".

Based on the same harmonic-scheme, these exercises are at a higher level with a contrapuntal writing inside.

Then we get to the "heart" of this method: "Practical exercises for choir".

It consists in different exercises for choral singing, using specific techniques to raise the level of the choir from both a technical and musical point of view.

These techniques combine intonation as psycho-acoustic features, without forgetting a careful ear-training and an effective memorization.

Each exercise should be practiced using all possible phonemes.

For this reason it is necessary that the choirmaster changes consonants and vowels articulation to solve specific problems of the choir.

I hope it is quite clear that the use of consonants and vowels in the exercises, as well as dynamics, are merely intended as suggestions and can be changed at any time.

I wish with this method to be able to help any choir to improve and get better.

One's never have to forget that a chorus is a wonderful, but at the same time, mysterious instrument.

Here you can express the deepest feelings of human beings, make closer friends, improve your temperament and much more.

At last, I must say, that a choir is mainly a "school of life" that is the highest way to practice "Great music", without forgetting that is also the most economical one!

*Daniele Venturi*

*lasciando quelli più complessi, non evolvendo così di molto il proprio livello iniziale.*

*Ogni esercizio è pensato per risolvere uno dei tanti problemi o imperfezioni di un coro e di ogni singola voce componente il coro stesso.*

*Il manuale è diviso in quattro parti.*

*Nella prima parte sono contenuti i "Vocalizzi ed esercizi preparatori", o meglio una serie di esercizi che debbono, in poco tempo, far migliorare il gruppo che con pazienza, tenacia e metodo li vada a praticare.*

*Nella seconda parte sono contenuti gli "Esercizi per la lettura cantata sui vari tempi". Questi brani sono scritti seguendo lo schema armonico principale: I-IV-I(2r)-V-I della scala Maggiore e possono, come peraltro tutti gli esercizi contenuti in questo metodo, essere eseguiti anche nel tono minore.*

*Si possono inoltre girare le varie voci, ottenendo diverse sonorità corali ed anche numerose altre chiavi di risoluzione dei problemi vocali ed intonativi di un coro.*

*Quando il corista avrà memorizzato il "giro armonico principale" potrà concentrare la propria attenzione, in particolare, sull'aspetto ritmico e sui vari tempi che cambieranno da un esercizio ad un altro. In questo modo il cantore potrà far evolvere naturalmente la propria lettura musicale cantata.*

*Segue poi la terza parte del metodo in cui sono contenuti gli "Esercizi polifonici per la lettura cantata".*

*Strutturati secondo lo stesso schema armonico, questi esercizi rappresentano un livello musicale successivo, con l'aggiunta dell'aspetto contrapuntistico.*

*Seguirà poi il corpus più massiccio del metodo gli "Esercizi funzionali per coro" o meglio una serie di lavori, che ha come funzione quella di fare crescere tecnicamente e musicalmente un coro, tramite specifiche tecniche, che fondono al proprio interno l'aspetto vocale e quello psico-acustico, non tralasciando il lavoro di miglioramento della memoria musicale e dell'orecchio interno del singolo corista.*

*Ogni esercizio deve essere praticato con tutti i fonemi possibili.*

*Il direttore, perciò, dovrà cambiare le consonanti e le vocali a seconda delle problematiche che il proprio coro dovrà risolvere.*

*Le consonanti e le vocali poste sotto gli esercizi sono puramente indicative, così come la dinamica, ove presente, ed anch'essa dovrà essere cambiata con la massima libertà e fantasia. Spero che questa mia serie di esercizi contribuisca a far migliorare i cori.*

*Il coro è uno strumento meraviglioso e allo stesso tempo misterioso.*

*Tramite il coro si possono esprimere i sentimenti più alti dell'animo umano, si possono trovare amici, si può migliorare il proprio carattere e tanto altro ancora.*

*Il coro è in primis una "scuola di vita", oltre che la maniera più alta ed "economica" per poter praticare la grande musica.*

*Daniele Venturi*

**a) Vocal and preparatory exercises**

- (1) Basic vocal exercise on five notes in the major scale, unison and at the octave

**a) Vocalizzi ed esercizi preparatori**

- (1) *Vocalizzo di base sulle cinque note della scala Maggiore all'unisono e all'ottava*

**Scorrevole**

Soprani  
Contralti  
Tenori  
Bassi

mi - u mi

- (2) Basic vocal exercise on five notes in the minor scale, unison and at the octave  
*Vocalizzo di base sulle cinque note della scala minore all'unisono e all'ottava*

S  
C  
T  
B

mi - u mi

- (3) Basic vocal exercise on five notes in the major scale, in canon form  
*Vocalizzo di base sulle cinque note della scala Maggiore in forma di canone*

S  
C  
T  
B

mi - u mi

(98) Diatonic four voice exercises with "mask" sounds  
*Vocalizzi diatonici a quattro voci con "suoni maschera"*

**Adagio**

S lu lu lu ecc.  
C lu lu lu ecc.  
T lu lu lu ecc.  
B lu lu lu ecc.

S  
C  
T  
B

S  
C  
T  
B



(195) First ascending tonal progression for eight voices with doubled octaves to approach romantic choral music

*Prima progressione tonale ascendente a otto voci con raddoppi d'ottava per l'avvicinamento alla musica corale romantica*

(196) Second descending tonal progression for eight voices with doubled octaves to approach romantic choral music

*Seconda progressione tonale discendente a otto voci con raddoppi d'ottava per l'avvicinamento alla musica corale romantica*
